# Supplementary material for: scRNA-seq Reveals the Mechanism of Fatty Acid Desaturase 2 Mutation to Repress Leaf Growth in Peanut (Arachis hypogaea L.)
Source: MDPI journal article supplement (doi:10.3390/cells12182305), 2023-09-19
Supplement: s1 [file s1]

## Supplementary Files

>*FAD2-A* coding sequence in high-oleic cultivar Yueyou271

ATGGGAGCTGGAGGGCGTGTCACTAAGATTGAAGCTCAAAAGAAGCCTCT  
TTCAAGGGTTCCACATTCAAACCCTCCATTCAAGTGTGGCCAACTCAAGAA  
AGCAATTCCACCACATTGCTTTGAACGTTCTCTTTTCATATCATTCTCCTATG  
TTGTCTATGATCTCTTAGTGGCCTACTTACTCTTCTACATTGCCACCACTTAT  
TTCCACAAGCTTCCATACCCATTTTCCTTCCTTGCTTGGCCAATCTATTGGGC  
CATCCAAGGCTGCATTCTCACTGGTGTGGGTGATTGCTCATGAGTGTGG  
CCACCATGCCTTCAGCAAGTACCAACTTGTTGATGACATGGTTGGTTTGAC  
CCTTCACTCTTGA(375bp)CTATTAGTTCCTTATTTCTCATGGAAAATCAGCCA  
CCGCCGCCACCACTCCAACACCGGTTCCCTCGACCGCAACGAAGTGTGTTG  
TCCCAAAACCAAAATCAAAGGTATCATGGTATAACAAGTACATGAACAATC  
CACCAGGGAGGGCTATCTCCCTCTTCATCACACTCACACTAGGATGGCCCT  
TGTAAGTGGCCTTCAATGTTTCTGGCAGACCCTATGATAGATTTGCAAGCCA  
CTATGACCCTTATGCTCCCATATACTCTAACAGGGGAAAGGCTTCTAATTTATG  
TCTCAGATTCATCTGTCTTTGCTGTAACATATCTGCTATATCACATAGCAACT  
TTGAAAGGTTTGGGTGGGTGGTATGTGTTTATGGGGTGCCATTGCTCATTG  
TGAATGGGTTTCTAGTTACCATAACCTATTTGCAGCACACACATGCATCATT  
GACTCACTATGATTCATCCGAATGGGACTGGTTAAGAGGAGCATTGGCAAC  
AGTGGACAGAGATTATGGGATACTGAATAAGGCATTTTCATCATATAACTGAT  
ACGCATGTGGCTCATCATTTGTTCTCAACAATGCCTCATTACCATGCAATGG  
AAGCAACCAATGCAATAAAGCCAATATTGGGTGATTACTACCAATTTGATGG  
CACCCAGTTTACAAAGCATTGTGGAGAGAAGCCAAAGAGTGCCTCTATGT  
GGAGCCAGATGATGGAGCTTCTCAGAAGGGTGTTTATTGGTACAAGAACA  
AGTTCTGA

>*FAD2-A* coding sequence in normal-oleic cultivar Yueyou43

ATGGGAGCTGGAGGGCGTGTCACTAAGATTGAAGCTCAAAAGAAGCCTCT  
TTCAAGGGTTCCACATTCAAACCCTCCATTCAAGTGTGGCCAACTCAAGAA  
AGCAATTCCACCACATTGCTTTGAACGTTCTCTTTTCATATCATTCTCCTATG  
TTGTCTATGATCTCTTAGTGGCCTACTTACTCTTCTACATTGCCACCACTTAT  
TTCCACAAGCTTCCATACCCATTTTCCTTCCTTGCTTGGCCAATCTATTGGGC  
CATCCAAGGCTGCATTCTCACTGGTGTGGGTGATTGCTCATGAGTGTGG  
CCACCATGCCTTCAGCAAGTACCAACTTGTTGATGACATGGTTGGTTTGAC  
CCTTCACTCTTGTCTATTAGTTCCTTATTTCTCATGGAAAATCAGCCACCGCC  
GCCACCACTCCAACACCGGTTCCCTCGACCGCGACGAAGTGTGTTGTCCCA  
AAACCAAAATCAAAGGTATCATGGTATAACAAGTACATGAACAATCCACCA  
GGGAGGGCTATCTCCCTCTTCATCACACTCACACTAGGATGGCCCTTGTAAGT  
TGGCCTTCAATGTTTCTGGCAGACCCTATGATAGATTTGCAAGCCACTATGA  
CCCTTATGCTCCCATATACTCTAACAGGGGAAAGGCTTCTAATTTATGTCTCAG  
ATTCATCTGTCTTTGCTGTAACATATCTGCTATATCACATAGCAACTCTGAAA  
GGTTTGGGTGGGTGGTATGTGTTTATGGGGTGCCATTGCTCATTGTGAATG  
GGTTTCTAGTTACCATAACCTATTTGCAGCACACACATGCATCATTGCCTCA  
CTATGATTCATCCGAATGGGACTGGTTAAGAGGAGCATTGGCAACAGTGGGA

CAGAGATTATGGGATACTGAATAAGGCATTTTCATCATATAACTGATACGCATG  
TGGCTCATCATTTGTTCTCAACAATGCCTCATTACCATGCAATGGAAGCAAC  
CAATGCAATAAAGCCAATATTGGGTGATTACTACCAATTTGATGGCACCCCA  
GTTTACAAAGCATTGTGGAGAGAAGCCAAAGAGTGCCTCTATGTGGAGCC  
AGATGATGGAGCTTCTCAGAAGGGTGTTTATTGGTACAAGAACAAGTTCTG  
A

>*FAD2-B* coding sequence in high-oleic cultivar Yueyou271

ATGGGAGCTGGAGGGCGTGTCATAAGATTGAAGCTCAAAAGAAGCCTCC  
TTCAAGGGTTCCACATTCAAACCCTCCATTCAAGTGTGGCCAACTCAAGAA  
GGCAATTCCACCACATTGCTTTGAACGTTCTCTTTTCATATCATTCTCATATG  
TTGTCTATGATCTCTTAATGGCCTACTTACTCTTCTACATTGCCACCACTTATT  
TCCACAAGCTTCCATACTCATTATCCTTCCTTGCTTGGCCAATCTATTGGGCC  
ATCCAAGGCTGCATTCTCACCGGTGTTTGGGTGATTGCTCATGAGTGTGGC  
CACCATGCCTTCAGCAAGTACCAACTTGTTGATGACATGGTTGGTTTGACC  
CTTCACTCTTGTCTATTAGTTCCTTATTTCTCGTGGAAAATCAGCCACCGCC  
GCCACCACTCCAACACAGGTTCCCTCA(442bp)GACCGCGACGAAGTGTGTTG  
TCCCGAAACCAAAATCAAAGGTATCATGGTATAACAAGTACATGAACAATC  
CACCAGGGAGGGCTATTTCCCTTTTCATCACACCCACACTAGGATGGCCCT  
TGTAATTGGCCTTCAATGTTTCTGGCAGACCCTATGATAGATTTGCAAGCCA  
CTATGACCCTTATGCTCCCATATACTCTAACAGGGAAAGGCTTCTAATTTATG  
TCTCAGATTCATCTGTCTTTGCTGTAACATATCTGCTATATCACATAGCAACT  
TTGAAAGGTTTGGGTGGGTGGTATGTGTTTATGGGGTGCCATTGCTCATTG  
TGAATGGGTTTCTAGTTACCATAACCTATTTGCAGCACACACATGCAGCATT  
GCCTCACTATGATTCATCCGAATGGGACTGGTTAAGAGGAGCATTGGCAAC  
AGTGGACAGAGATTATGGGATACTGAATAAGGCATTTTCATCATATAACTGAT  
ACGCATGTGGCTCATCATTTGTTCTCAACAATGCCTCATTACCATGCAATGG  
AAGCAACCAATGCAATAAAGCCAATATTGGGTGATTACTACCAATTTGATGG  
CACCCCAGTTTACAAAGCATTGTGGAGAGAAGCCAAAGAGTGCCTCTATGT  
GGAGCCAGATGATGGAGCTTCTCAGAAGGGTGTTTATTGGTACAAGAACA  
AGTTCTGA

>*FAD2-B* coding sequence in normal-oleic cultivar Yueyou43

ATGGGAGCTGGAGGGCGTGTCATAAGATTGAAGCTCAAAAGAAGCCTCT  
TTCAAGGGTTCCACATTCAAACCCTCCATTCAAGTGTGGCCAACTCAAGAA  
AGCAATTCCACCACATTGCTTTGAACGTTCTCTTTTCATATCATTCTCATATG  
TTGTCTATGATCTCTTAATGGCCTACTTACTCTTCTACATTGCCACCACTTATT  
TCCACAAGCTTCCATACCCATTTTCCTTCCTTGCTTGGCCAATCTATTGGGC  
CATCCAAGGCTGCATTCTCACCGGTGTTTGGGTGATTGCTCATGAGTGTGG  
CCACCATGCCTTCAGCAAGTACCAACTTGTTGATGACATGGTTGGTTTGAC  
CCTTCACTCTTGTCTATTAGTTCCTTATTTCTCATGGAAAATCAGCCACCGCC  
GCCACCACTCCAACACAGGTTCCCTCGACCGCGACGAAGTGTGTTGTCCCG  
AAACCAAAAATCAAAGGTATCATGGTATAACAAGTACATGAACAATCCACCA  
GGGAGGGCTATTTCTCTTTTCATCACACTCACACTAGGATGGCCCTTGTACC  
TGGCCTTCAATGTTTCTGGCAGACCCTATGATAGATTTGCAAGCCACTATGA  
CCCTTATGCTCCCATATACTCTAACAGGGAAAGGCTTCTAATTTATGTCTCAG

ATTCATCTGTCTTTGCTGTAACATATCTGCTATATCACATAGCAACTTTGAAA  
GGTTTGGGTTGGGTGGTATGTGTTTATGGGGTGCCATTGCTCATTGTGAATG  
GGTTTCTAGTTACCATAACCTATTTGCAGCACACACATGCATCATTGCCTCA  
CTATGATTCATCCGAATGGGACTGGTTAAGAGGAGCATTGGCAACAGTGGA  
CAGAGATTATGGGATACTGAATAAGGCATTTTCATCATATAACTGATACGCATG  
TGGCTCATCATTTGTTCTCAACGATGCCTCATTACCATGCAATGGAAGCAAC  
CAATGCAATAAAGCCAATATTGGGTGATTACTACCAATTTGATGGCACCCCA  
GTTTACAAAGCATTGTGGAGAGAAGCCAAAGAGTGCCTCTATGTGGAGCC  
AGATGATGGAGCTTCTCAGAAGGGTGTTTATTGGTACAAGAACAAGTTCTG  
A

**Figure S1.** Coding sequence of *FAD2-A* and *FAD2-B* in Yueyou271 (high oleic acid peanut) and Yueyou43 (normal oleic acid peanut).

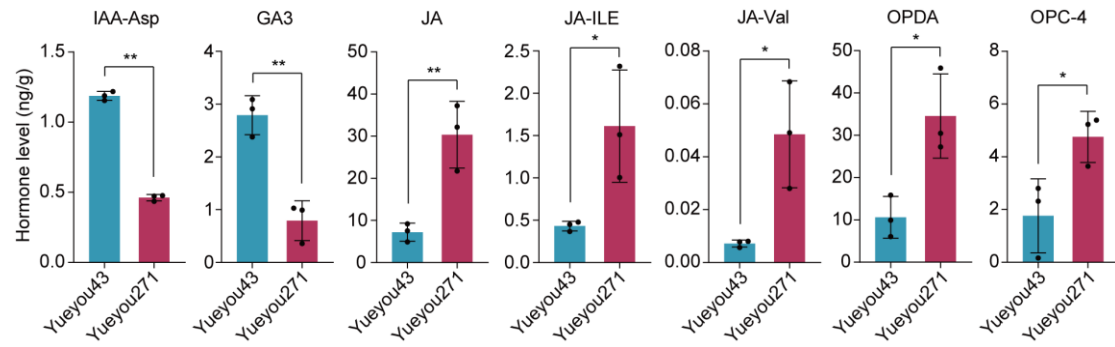

**Figure S2.** Phytohormone detection results in seedling leaves of Yueyou43 and Yueyou271. The histograms indicate the mean  $\pm$  SD of three biological replicates. The asterisks indicate significant differences between the two varieties (T-test, \* $p < 0.05$ , \*\* $p < 0.01$ ).

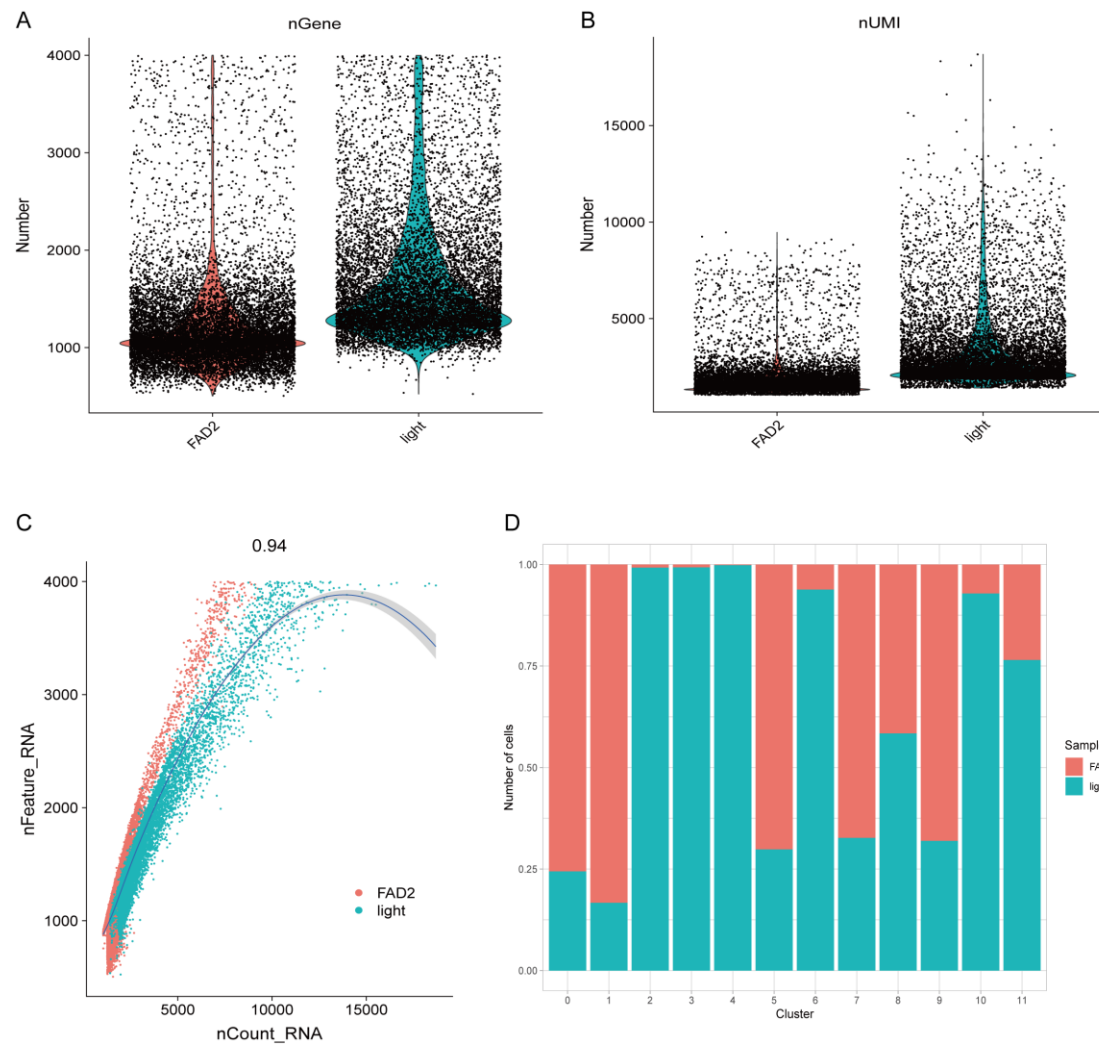

**Figure S3.** scRNA-seq raw data quality control. (A, B) Distribution of number of genes and UMIs. (C) Scatter plot depicting the number of genes (nFeature\_RNA) and number of transcripts (nCount\_RNA) per cell. (D) The cell distribution in each peanut leaf cell cluster.

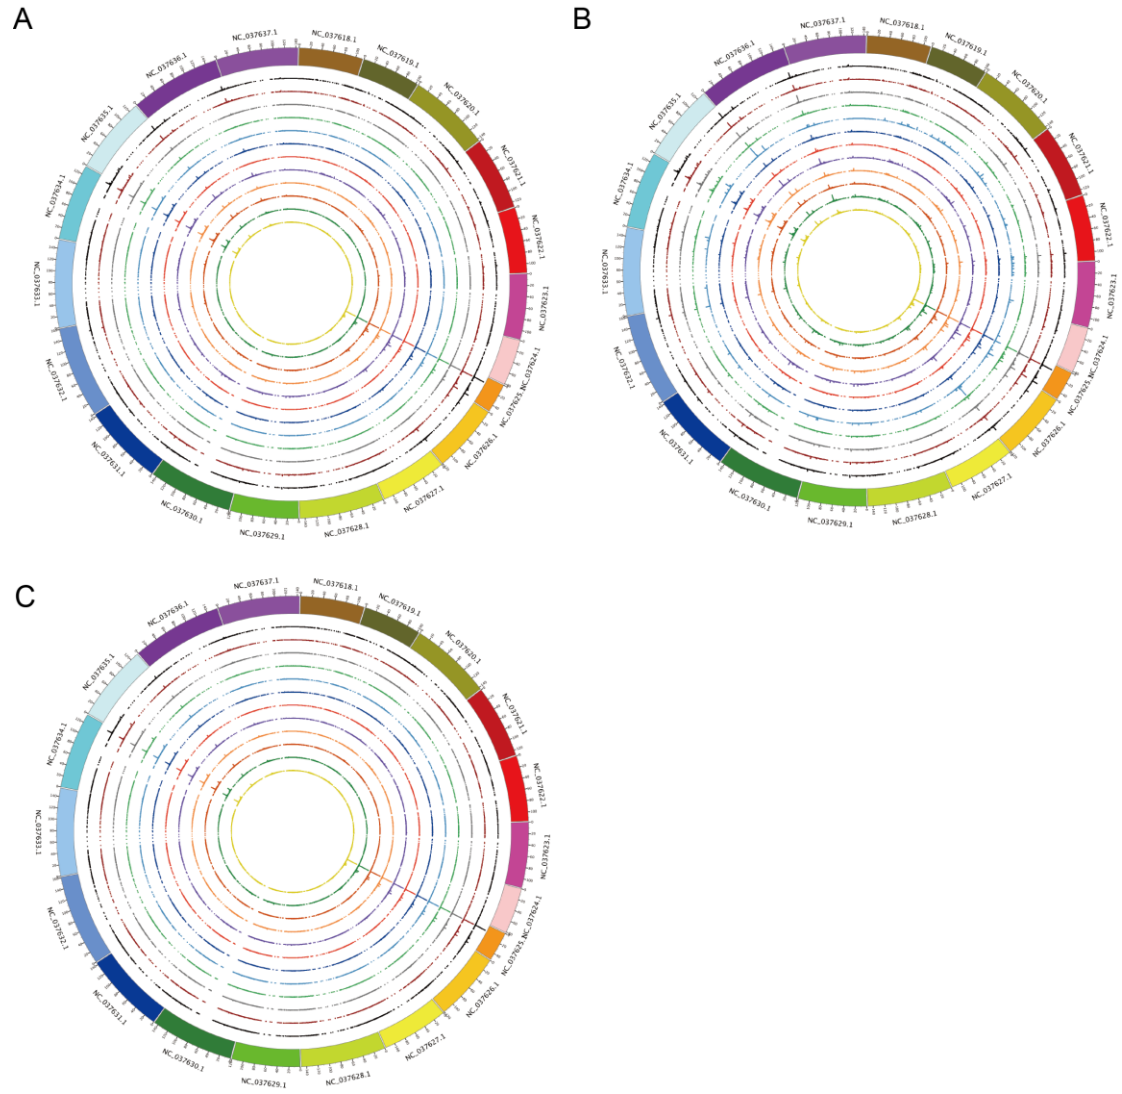

**Figure S4.** Circos plots depicting the single-cell gene expression pattern in leaf cells of total transcription factors (TFs). (A) Total TFs in both samples. (B) Total TFs in high-OA variety Yueyou271. (C) Total TFs in normal variety Yueyou43. From outer circular to inner circular represent the cell cluster 0 to 11.

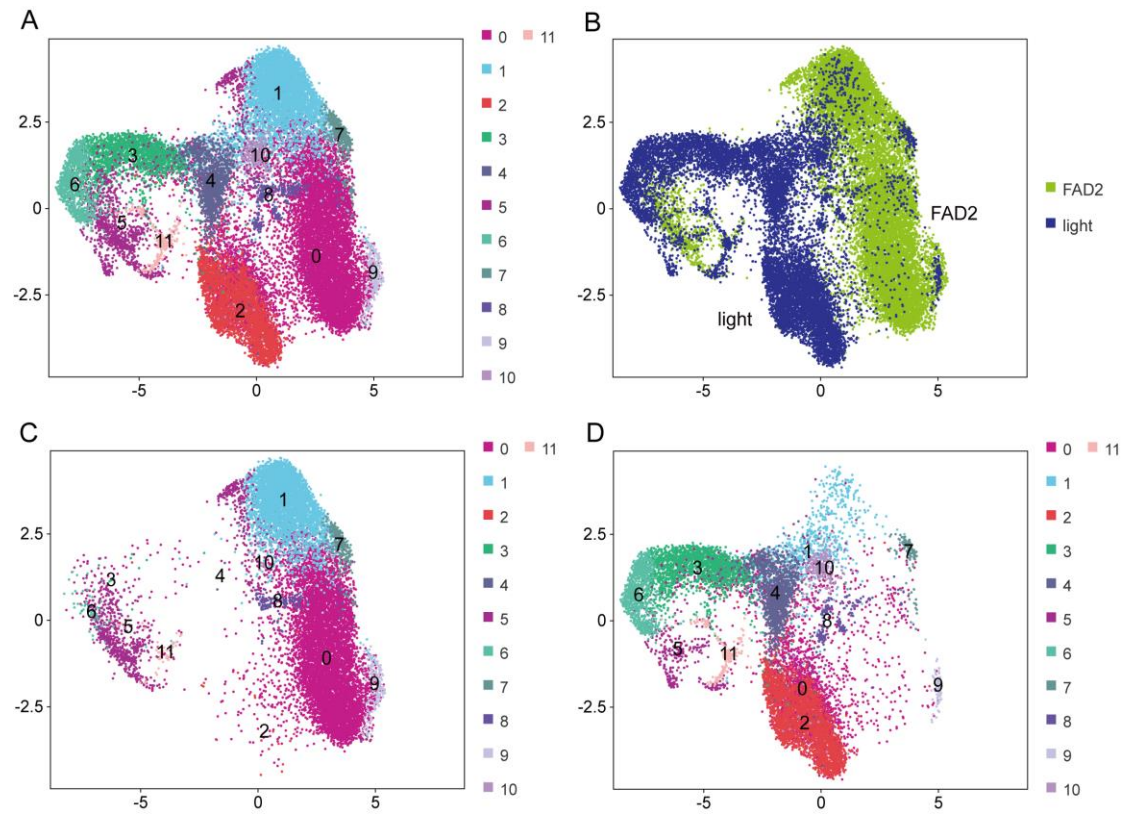

**Figure S5.** Visualization of 12 cell clusters using UMAP plot, each dot indicates individual cells colored based on cluster number (A) and sample ID (B). (C) and (D) are UMAP plots for cells from the *fad2* and normal peanut samples, respectively.

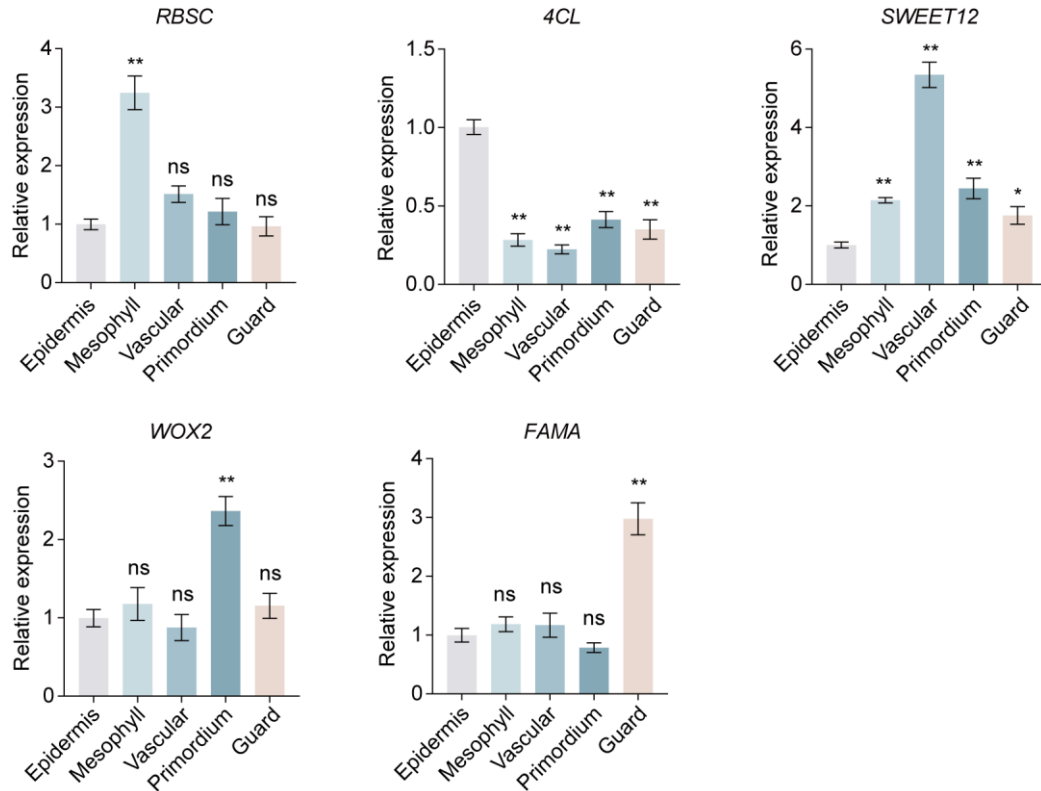

**Figure S6.** The validation of scRNA-seq data of the five marker genes. Histograms indicate the mean  $\pm$  SD of three biological replicates. The asterisks indicate significant differences between the epidermis and other cell types. (T-test, \* $p < 0.05$ , \*\* $p < 0.01$ ).



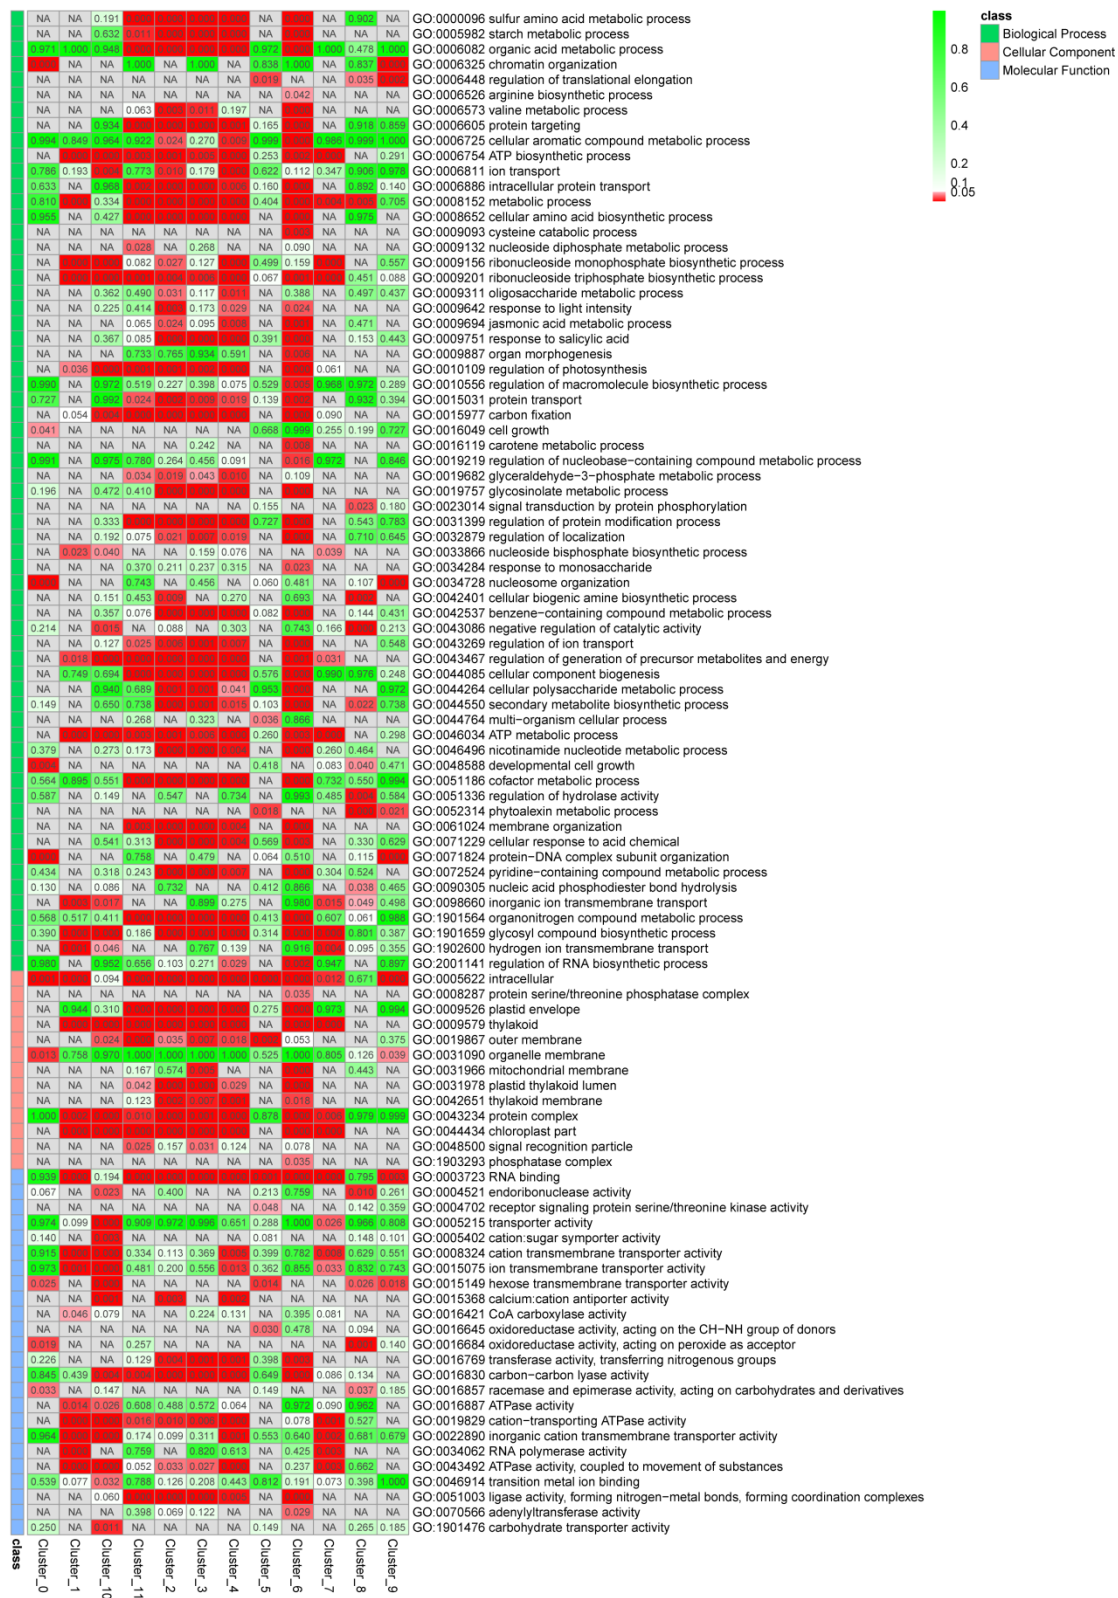

**Figure S7.** Go enrichment analysis of all DEGs.

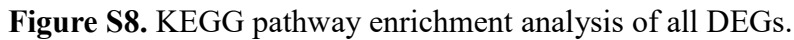

**Figure S8.** KEGG pathway enrichment analysis of all DEGs.

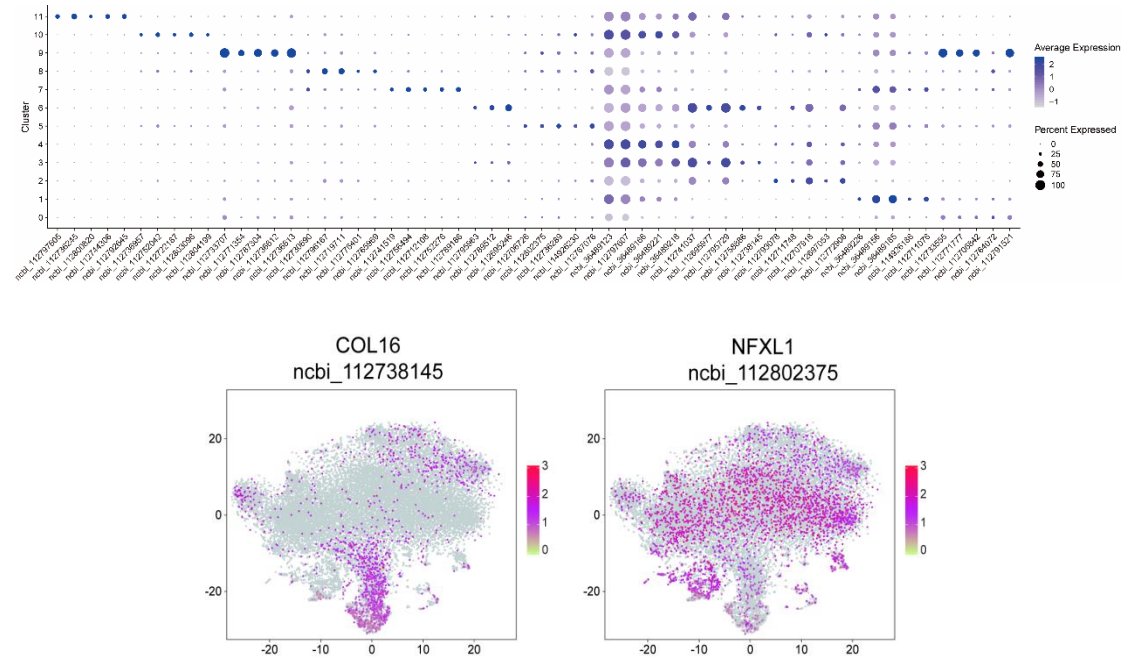

**Figure S9.** Dot plot depicting top five genes for each cell cluster and the cell expression distributions of two TFs (COL16 and NFXL1) in top five genes profile. Color intensity indicates the relative transcript level (average expression scale) for the indicated gene in each cell.

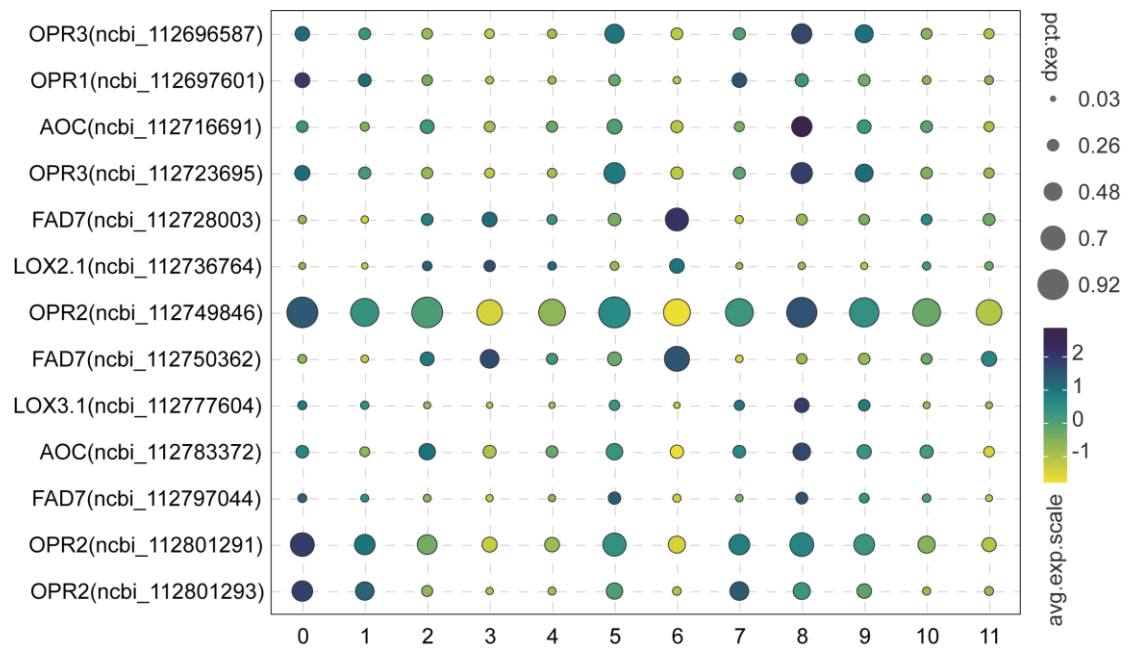

**Figure S10.** DEGs involved into the JA biosynthesis pathway.

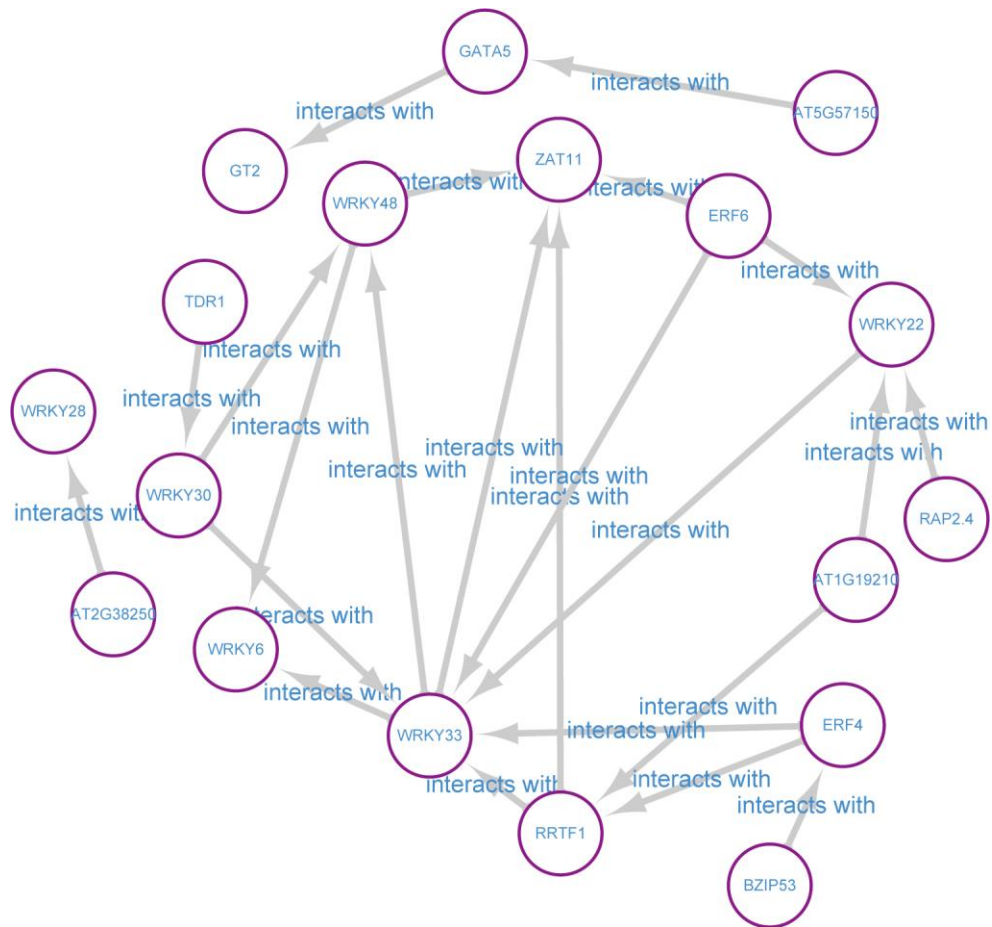

**Figure S11.** Interaction network of TFs constructed using *Arabidopsis* homologues of the 65 TFs in 1,649 core-DEGs profile.

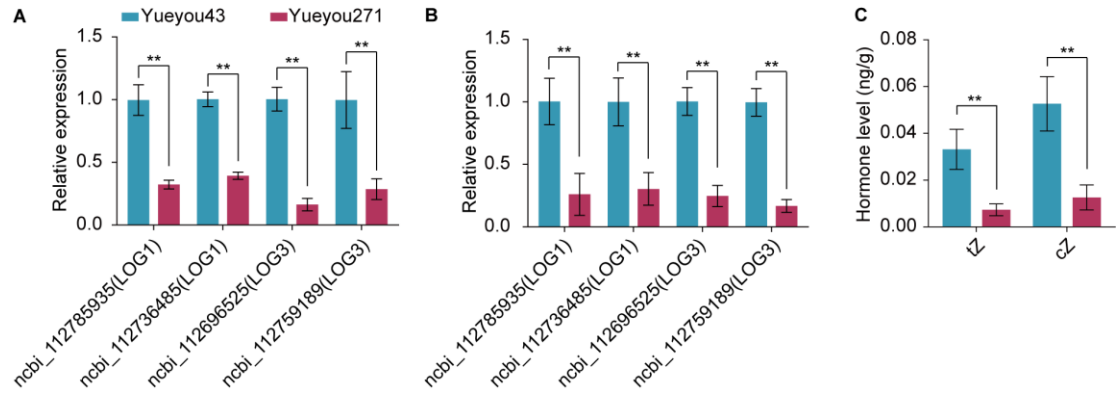

**Figure S12.** The validation of the scRNA-seq data in distinct cell populations. Histograms indicate the mean  $\pm$  SD of three biological replicates. The asterisks indicate significant differences between the two varieties (T-test, \* $p < 0.05$ , \*\* $p < 0.01$ ). (A) The expression level of four *LOG* genes in the leaf blade of the two varieties. (B) The expression level of four *LOG* genes in the leaf vein of the two varieties. (C) The cytokinin content in the leaf vein of the two varieties.



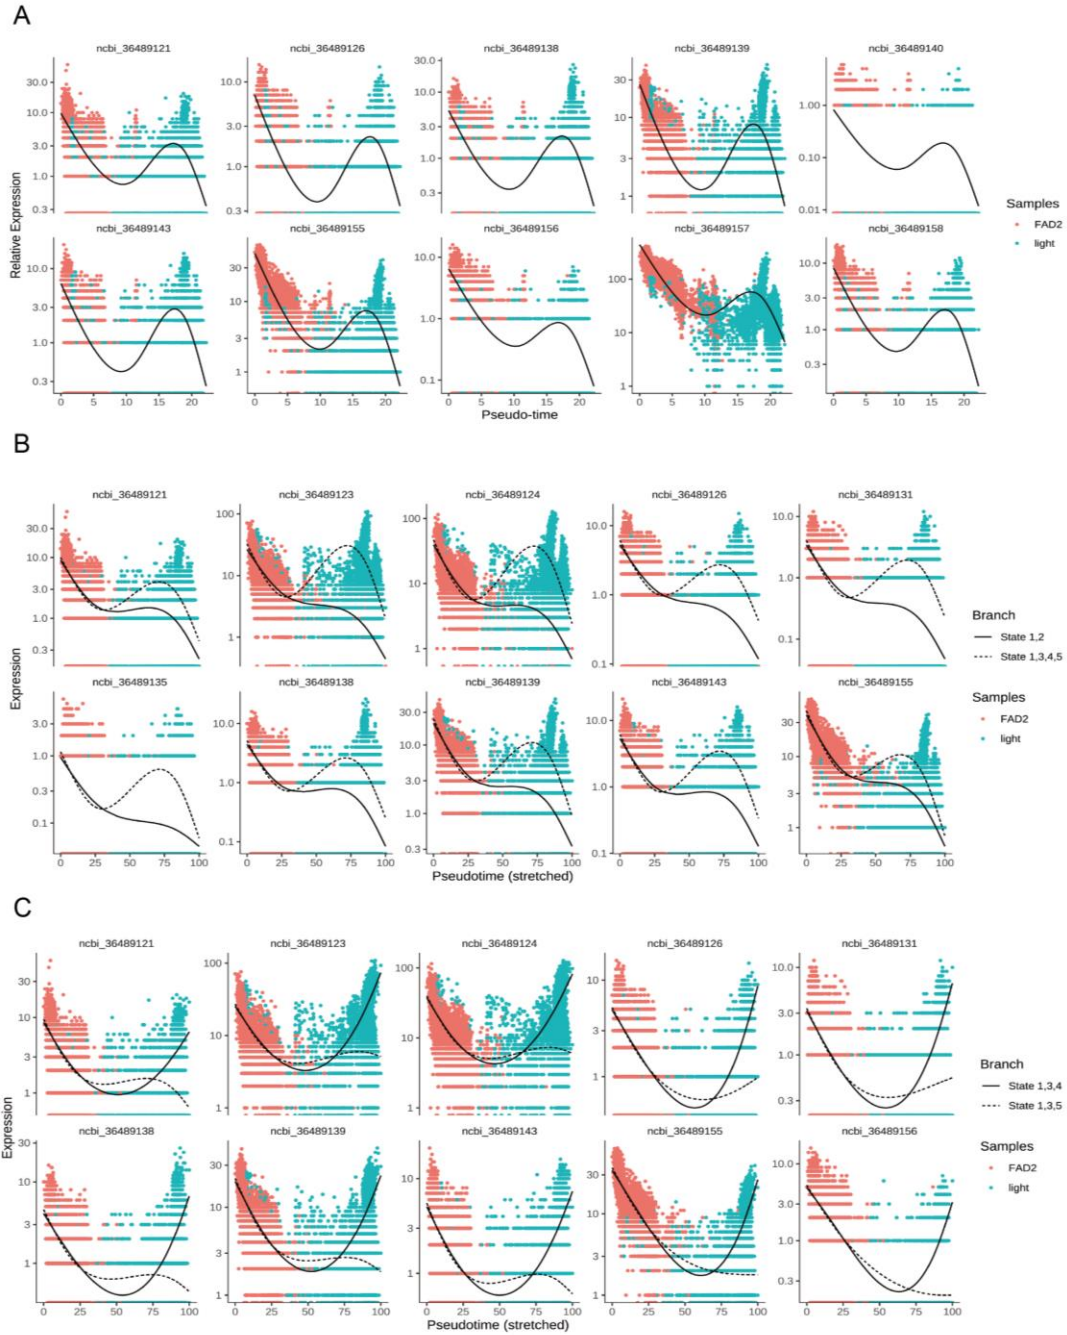

**Figure S13.** The relative expression of the top ten DEGs in the whole differentiation trajectory (A), cell differentiation branch 1 (B) and branch 2 (C).

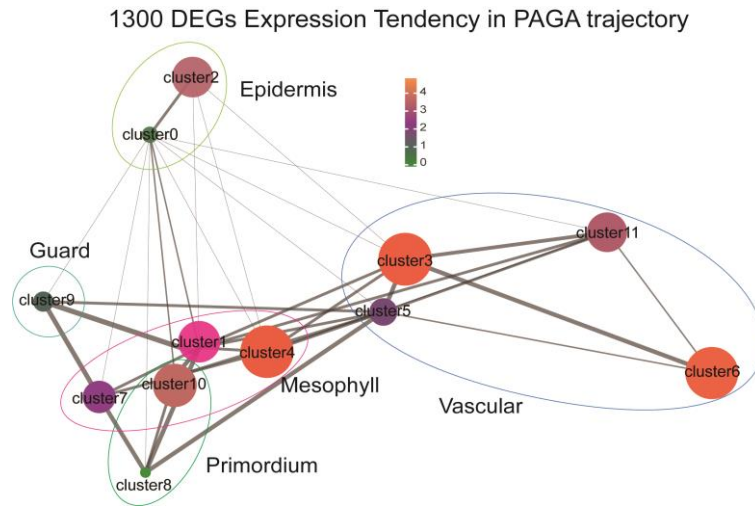

**Figure S14.** Expression tendency of 1,300 DEGs in PAGA trajectory.



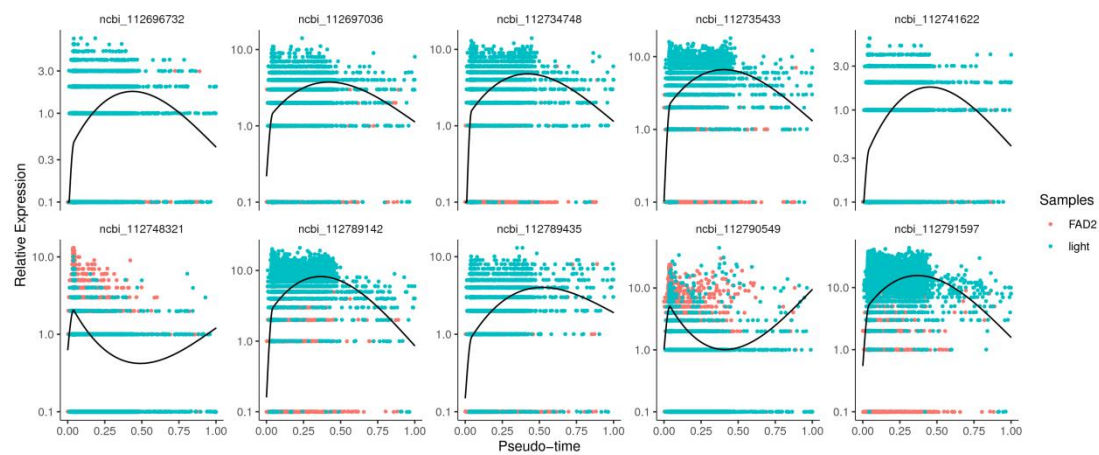

**Figure S15.** The relative expression of top ten DEGs in PAGA trajectory.

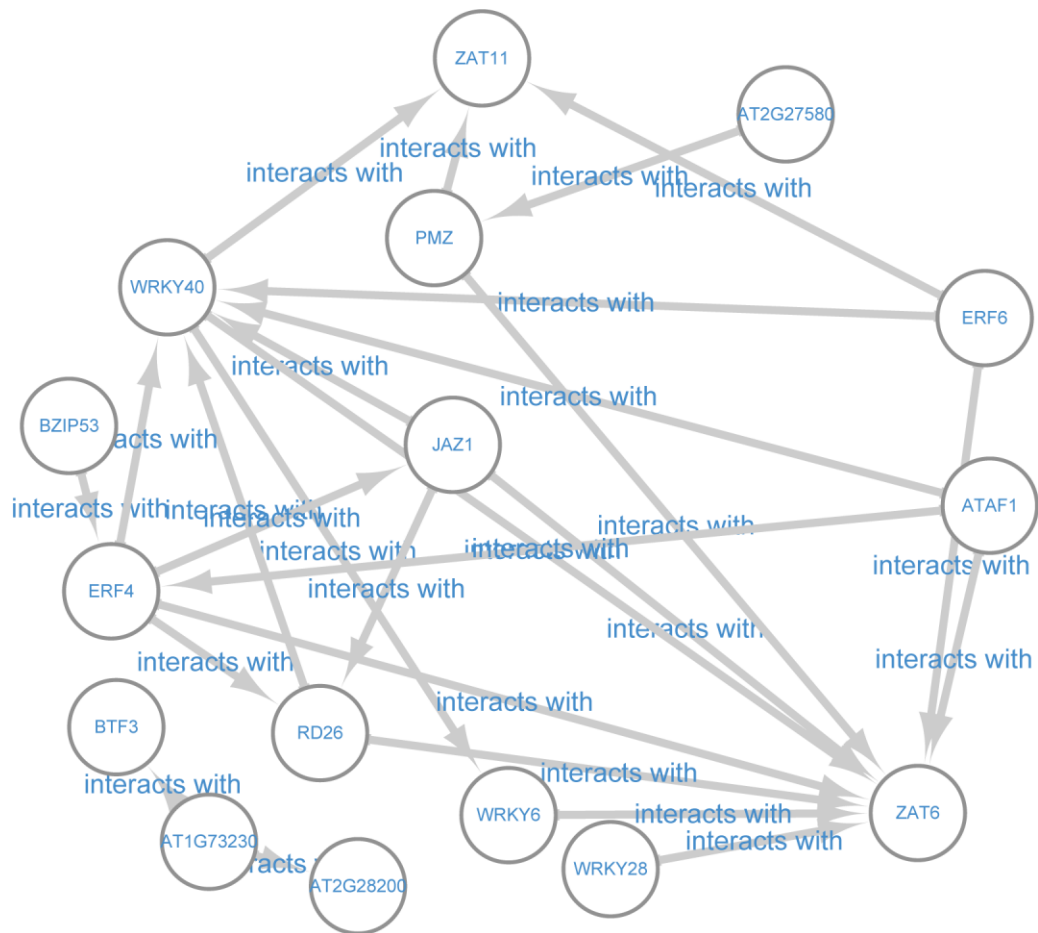

**Figure S16.** Interaction network of TFs constructed using *Arabidopsis* homologues of the 48 TFs in the 1,251 core-DEGs profile.

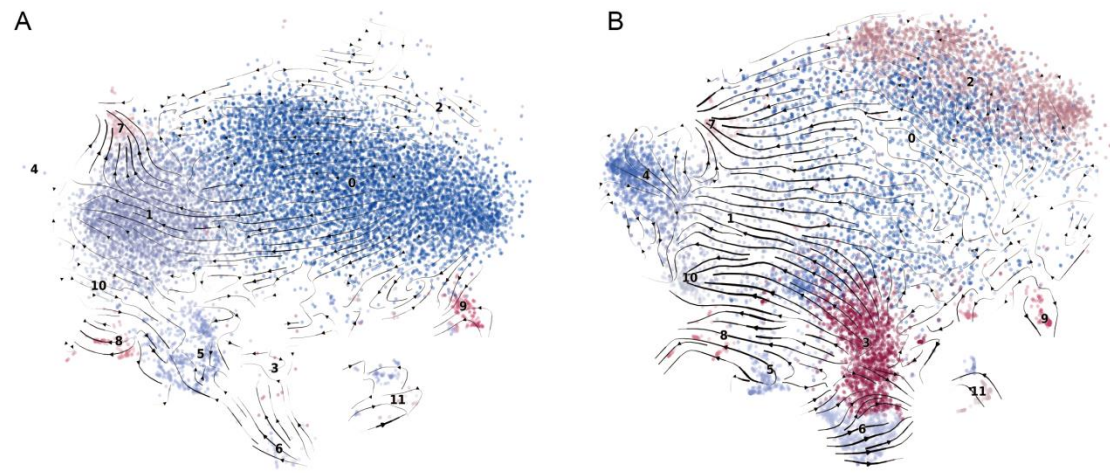

**Figure S17.** RNA velocity analysis of seedling leaf cells of high-OA peanut (A) and normal peanut (B).

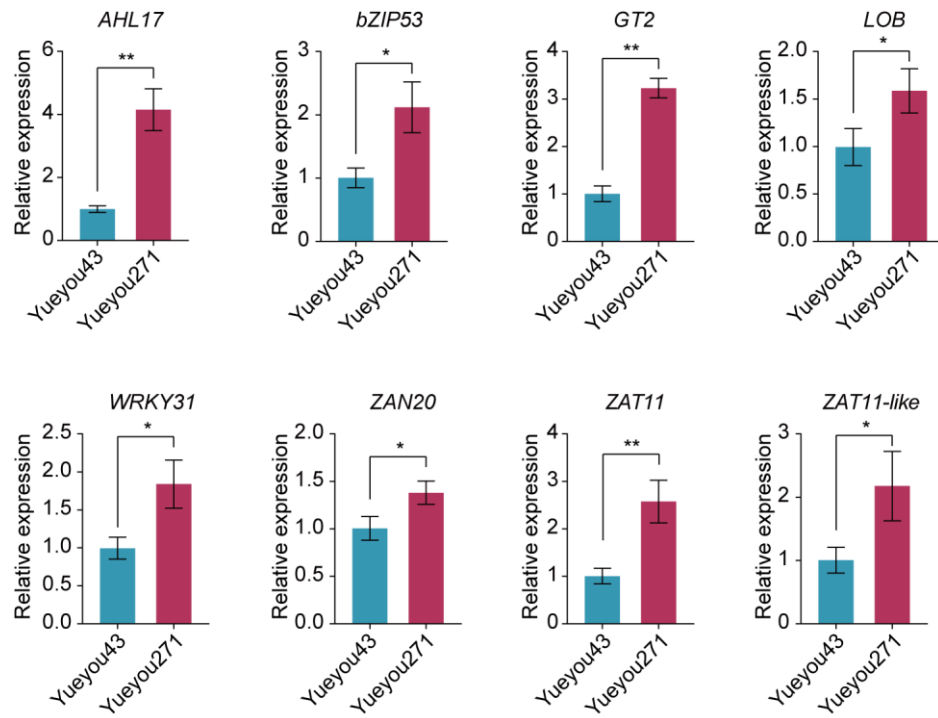

**Figure S18.** The validation of scRNA-seq data of the eight critical TFs identified from the 1,113 core DEGs. Histograms indicate the mean  $\pm$  SD of three biological replicates. The asterisks indicate significant differences between the two varieties (T-test, \*p < 0.05, \*\*p < 0.01).
